# Supplementary material
Source: PubMed Central journal article supplement (PMC5134971)
Supplement: supp_tpc.15.01011_TPC2015-01011-RAR2_Supplemental_Data.pdf [file supp_tpc.15.01011_TPC2015-01011-RAR2_Supplemental_Data.pdf]

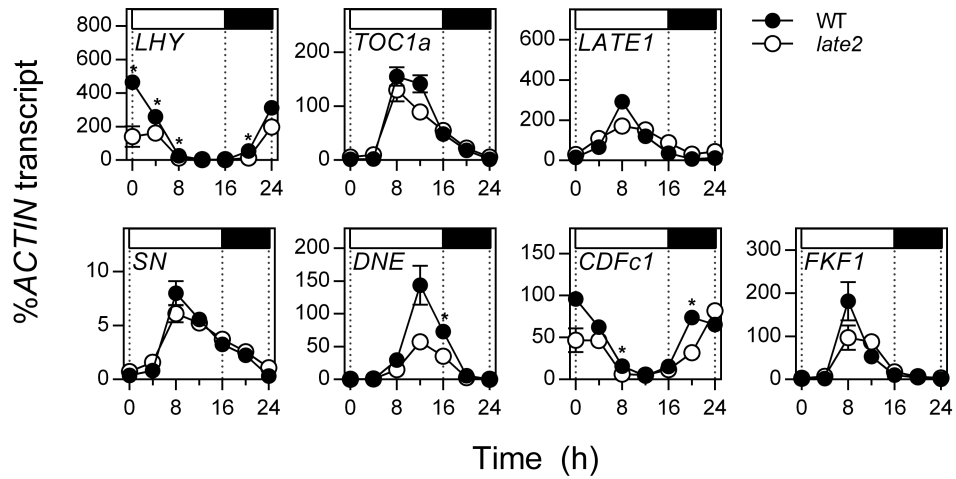

**Supplemental Figure 1:** Rhythmic expression patterns of circadian clock genes under LD cycles.

Transcript levels were determined in the second uppermost fully expanded leaf of 3-week-old wild-type (NGB5839) and *late2-1D* mutant plants grown under a 16 h LD photoperiod at 20°C. Mean values ± SE are shown for  $n = 2$  biological replicates, each consisting of pooled material from two plants. Asterisks indicate significantly different values ( $P \leq 0.05$ ). Day and night periods are respectively indicated by white and black bars above the graph. Note that both genotypes carry the *hr* mutation (Weller et al., 2012).

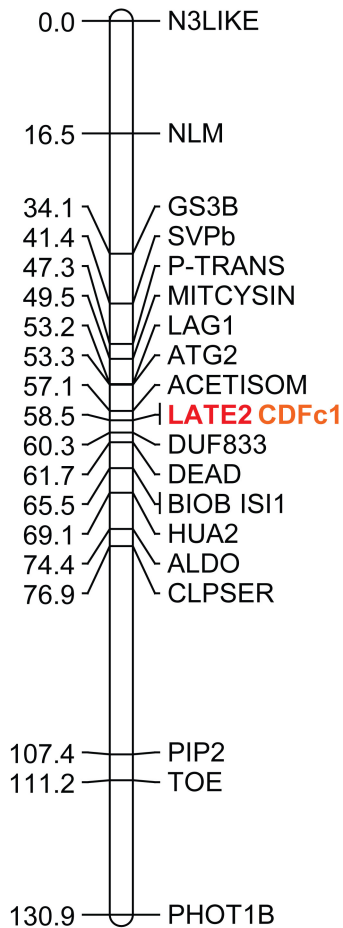

**Supplemental Figure 2:** Position of *LATE2* in pea linkage group VII.

Partial map of linkage group VII derived from analysis of segregation data in the F<sub>2</sub> generation of a cross between *late2-1D* and cv. T r se (219 F<sub>2</sub> plants), using JoinMap software (v4; Kyazma B.V., Wageningen, Netherlands). A marker for *CDFc1* based on the C1348T transition (**Figure 5**), co-segregated perfectly with the *late2-1D* genotype. Full details for markers are given in **Supplemental Table 2**.

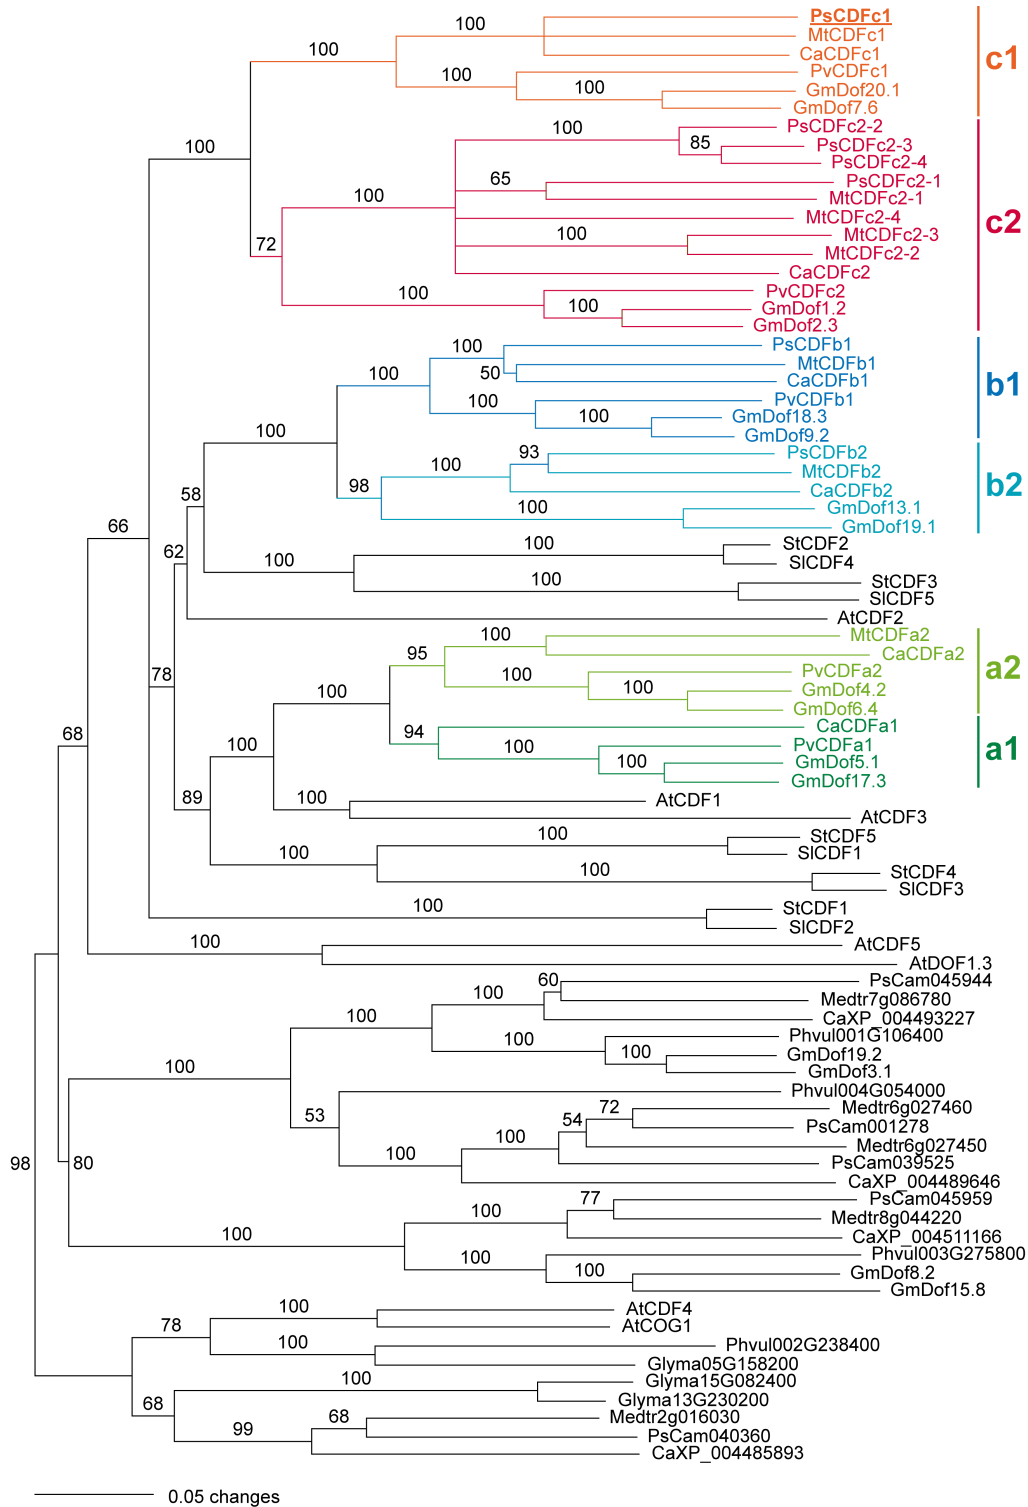

**Supplemental Figure 3:** Phylogram of the legume CDF family and related DOF transcription factors. Legume clades are indicated. Bootstrap values obtained from 1,000 trees are indicated as a percentage above each branch. Branches with bootstrap values <50% have been collapsed. The analysis is based on the sequence alignment shown in **Supplemental File 2**. Sequence details and species abbreviations are given in **Supplemental Table 1**.

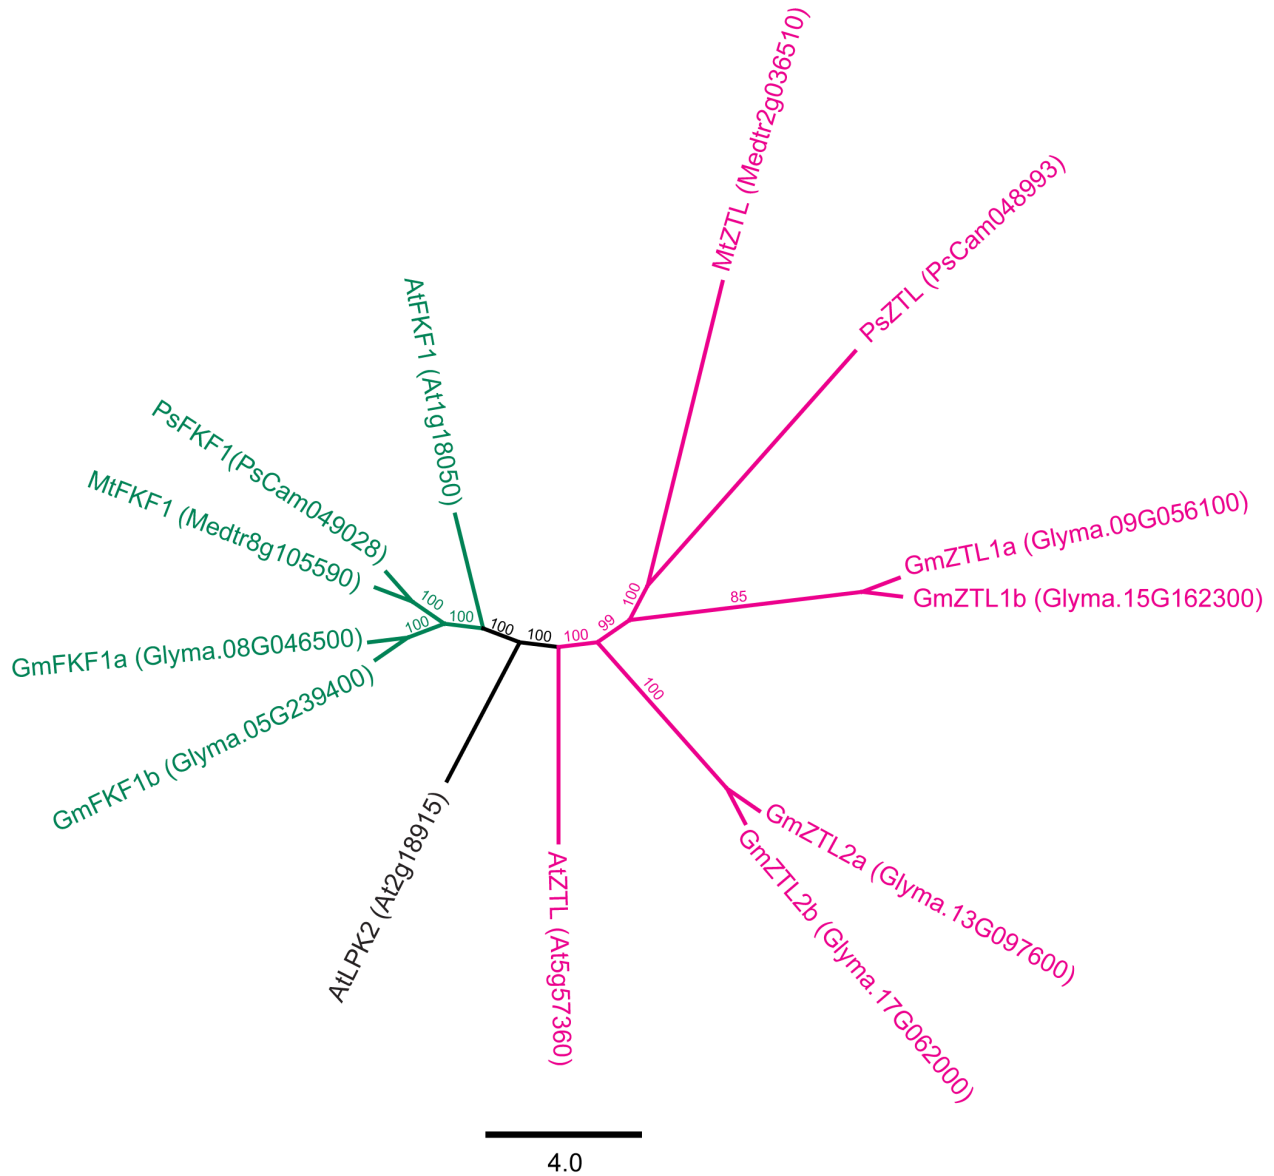

**Supplemental Figure 4:** Phylogram of the legume FKF1 protein family.

Previously characterised family members from Arabidopsis are included (Nelson et al., 2000; Somers et al., 2000; Schultz et al., 2001). Additional pea, Medicago and soybean genes were identified by BLASTp or tBLASTn searches conducted using Arabidopsis protein sequences to query the pea expressed sequences at the pea RNA-seq gene atlas (<http://bios.dijon.inra.fr/FATAL/cgi/pscam.cgi>) or GenBank EST, TSA or nucleotide databases, and Medicago (v4.0) and soybean (Wm82.a2.v1) protein databases at Phytosome ([phytosome.jgi.doe.gov](http://phytosome.jgi.doe.gov)). The analysis is based on the sequence alignment shown in **Supplemental File 3**. Branches with bootstrap values <50% obtained from 1,000 trees have been collapsed.

At, *Arabidopsis thaliana*; Gm, *Glycine max*; Mt, *Medicago truncatula*; Ps, *Pisum sativum*.





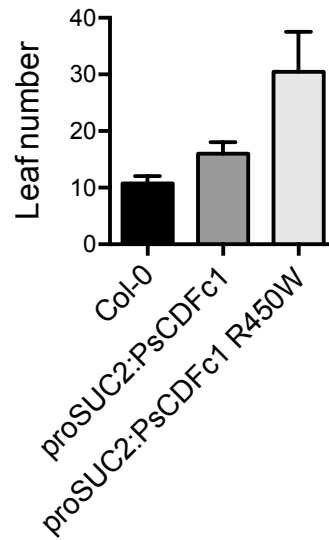

**Supplemental Figure 6:** Leaf number at flowering in both wild-type and transgenic Arabidopsis lines expressing WT and R450W forms of *PsCDFc1* from the *SUC2* promoter. Plants were grown under LD. Values represent mean  $\pm$  SE for n=8 to 9.

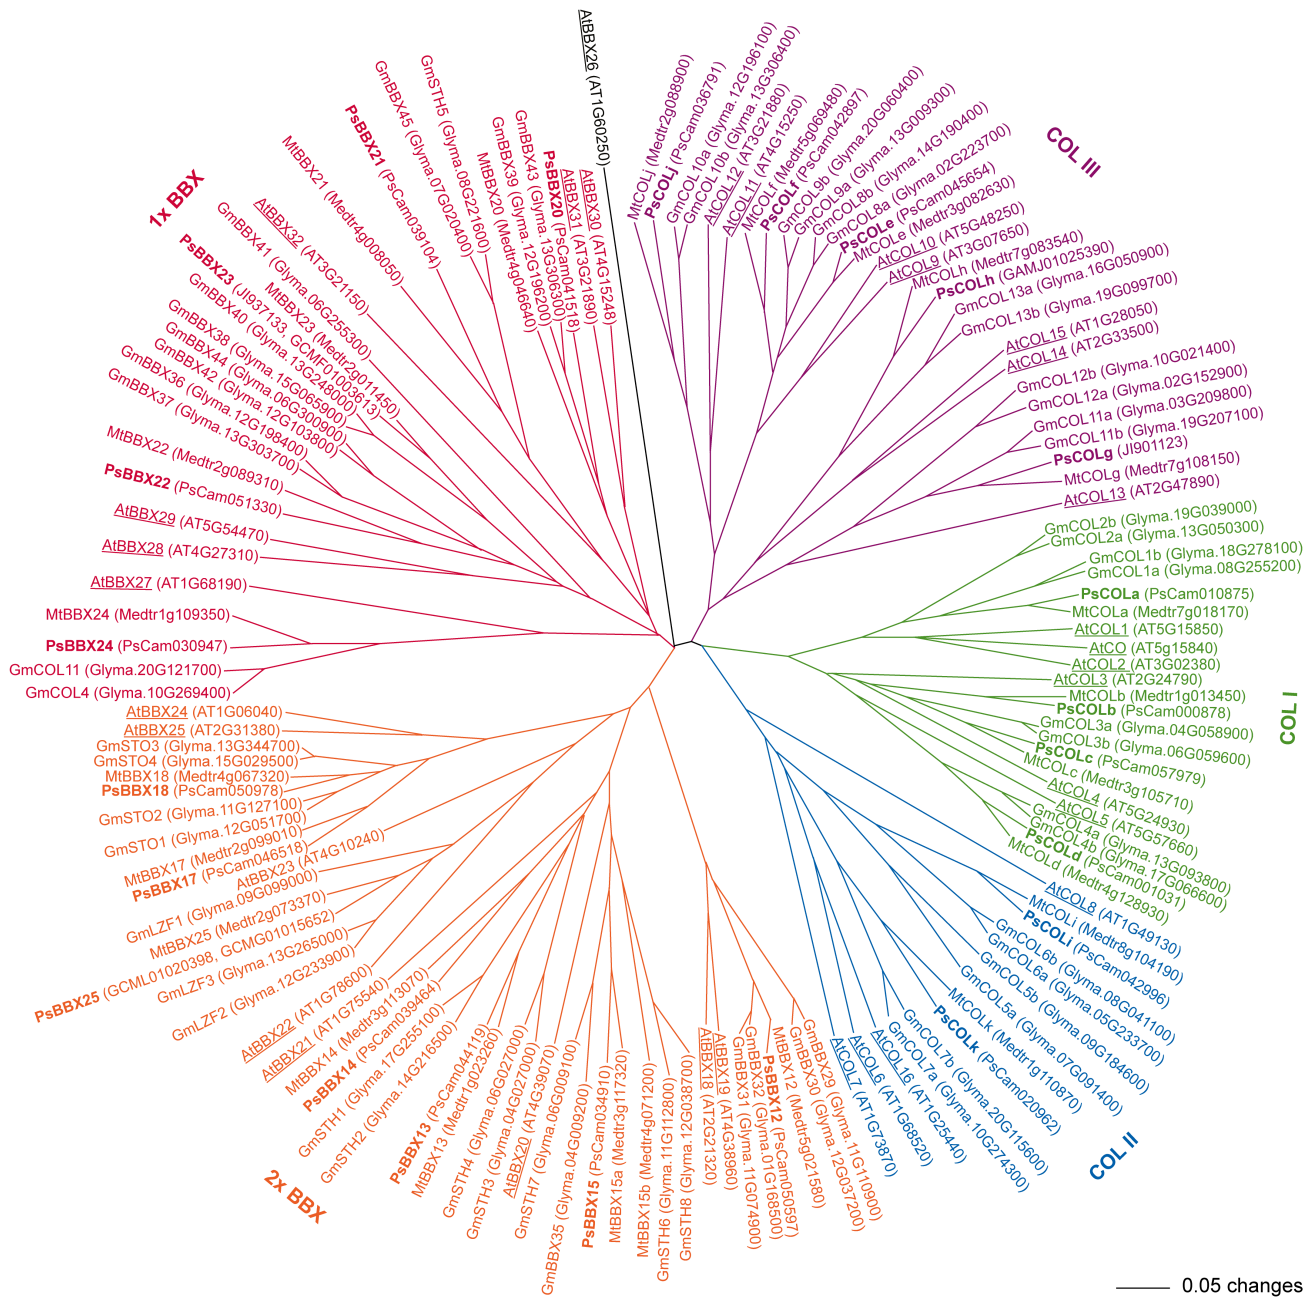

**Supplemental Figure 7: Phylogram of the legume BBX protein family.**

Previously characterised family members from Arabidopsis, soybean (excluding those not present in the current Wm82.a2.v1 genome annotation) and Medicago are included (Robson et al., 2001; Khanna et al., 2009; Fan et al., 2014; Wong et al., 2014; Wu et al., 2014). Additional pea and Medicago proteins were identified by BLASTp or tBLASTn searches conducted using Arabidopsis protein sequences to query the pea expressed sequences at the pea RNA-seq gene atlas (<http://bios.dijon.inra.fr/FATAL/cgi/pscam.cgi>) or GenBank EST, TSA or nucleotide databases, and the Medicago (v4.0) protein database at Phytozome (phytozome.jgi.doe.gov). The analysis is based on the sequence alignment shown in **Supplemental File 4**. Branches with bootstrap values <50% obtained from 1,000 trees have been collapsed.

At, *Arabidopsis thaliana*; Gm, *Glycine max*; Mt, *Medicago truncatula*; Ps, *Pisum sativum*.

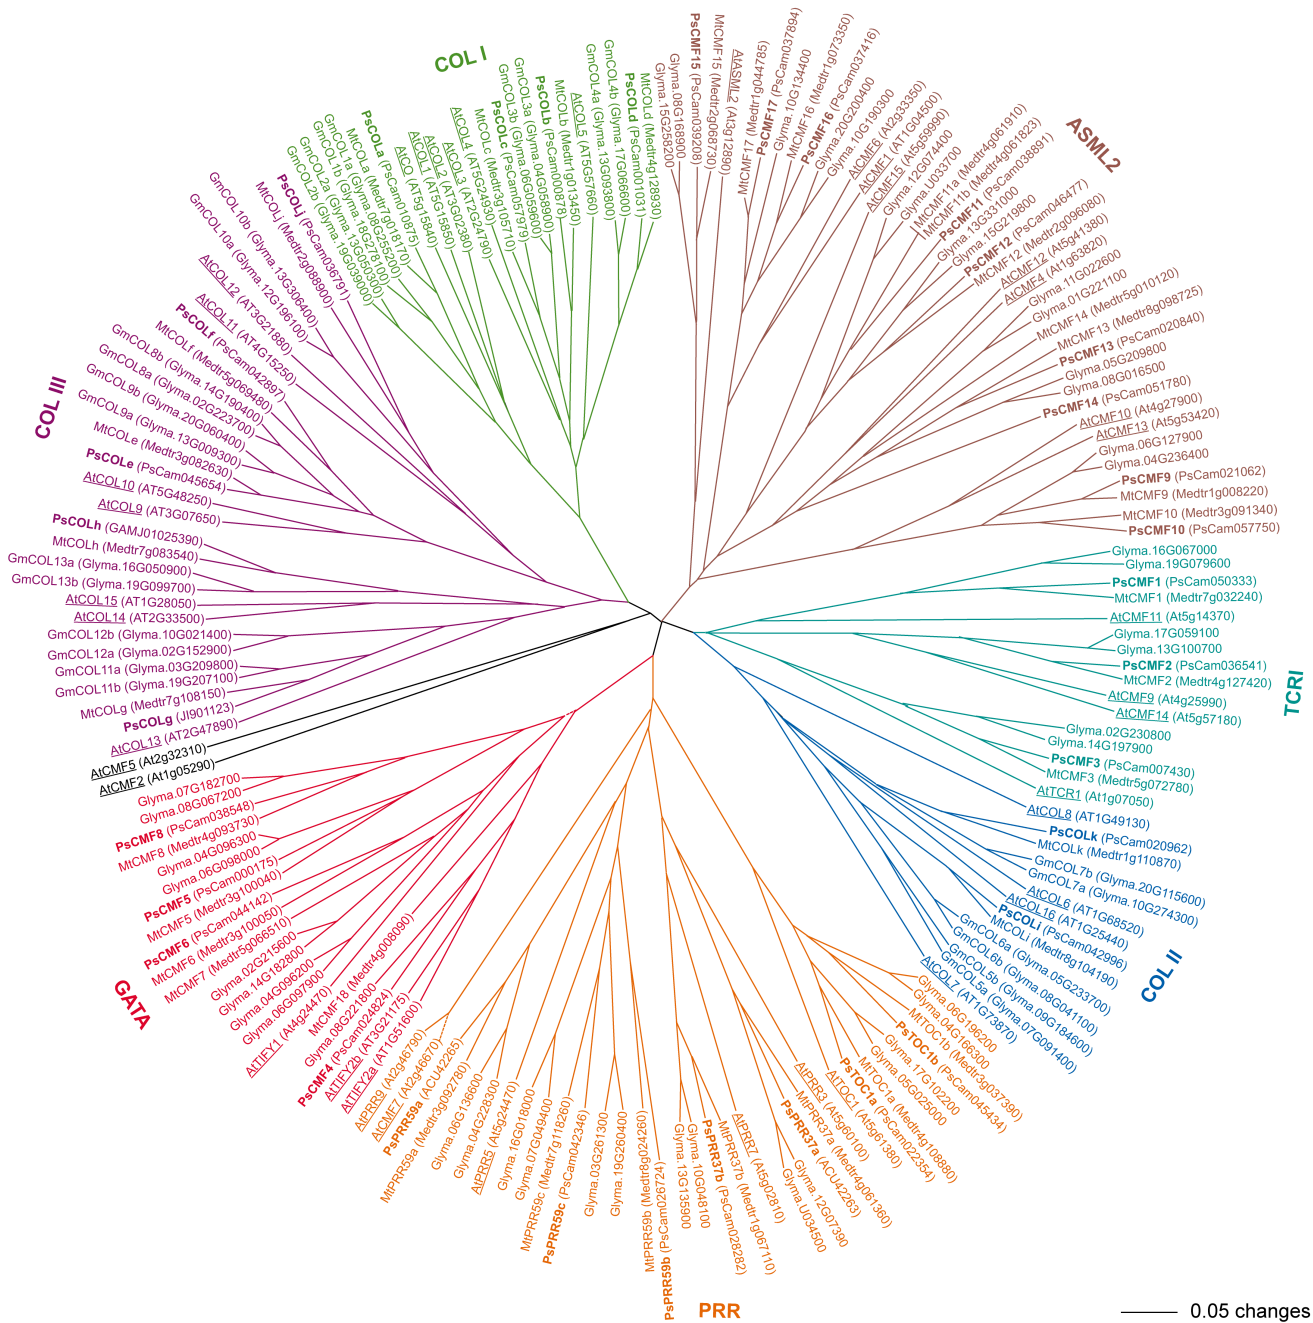

**Supplemental Figure 8:** Phylogram of the legume CCT protein family.

Previously characterised family members from Arabidopsis, soybean and Medicago are included (Iwata et al., 2008; Fan et al., 2014; Wong et al., 2014; Wu et al., 2014). Additional pea, Medicago and soybean genes were identified by BLASTp or tBLASTn searches conducted using Arabidopsis protein sequences to query the pea expressed sequences at the pea RNA-seq gene atlas (<http://bios.dijon.inra.fr/FATAL/cgi/pscam.cgi>) or GenBank EST, TSA or nucleotide databases, and Medicago (v4.0) and soybean (Wm82.a2.v1) protein databases at Phytosome ([phytosome.jgi.doe.gov](http://phytosome.jgi.doe.gov)). The analysis is based on the sequence alignment shown in Supplemental File 5. Branches with bootstrap values <50% obtained from 1,000 trees have been collapsed.

At, *Arabidopsis thaliana*; Gm, *Glycine max*; Mt, *Medicago truncatula*; Ps, *Pisum sativum*.

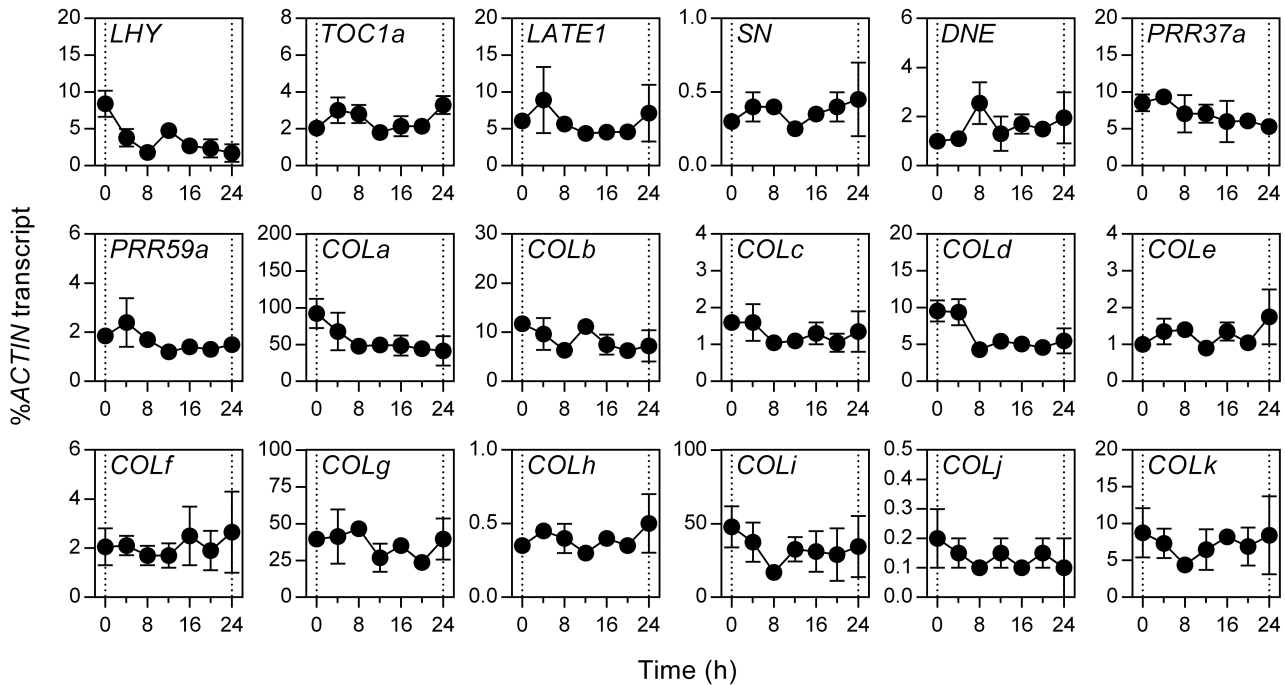

**Supplemental Figure 9:** Expression patterns of clock-related and *COL* family genes under constant light. Transcript levels were determined in the second uppermost fully expanded leaf of 3-week-old wild-type (NGB5839) plants grown under constant light conditions at 20°C. Seeds were sown in soil and allowed to germinate for several days in complete darkness by covering the pot top with aluminium foil and maintaining plants in a dark growth cabinet. First exposure of emerging seedlings to light was then synchronized by turning lights on and removing the foil. Mean values  $\pm$  SE are shown for  $n = 2$  biological replicates, each consisting of pooled material from two plants.



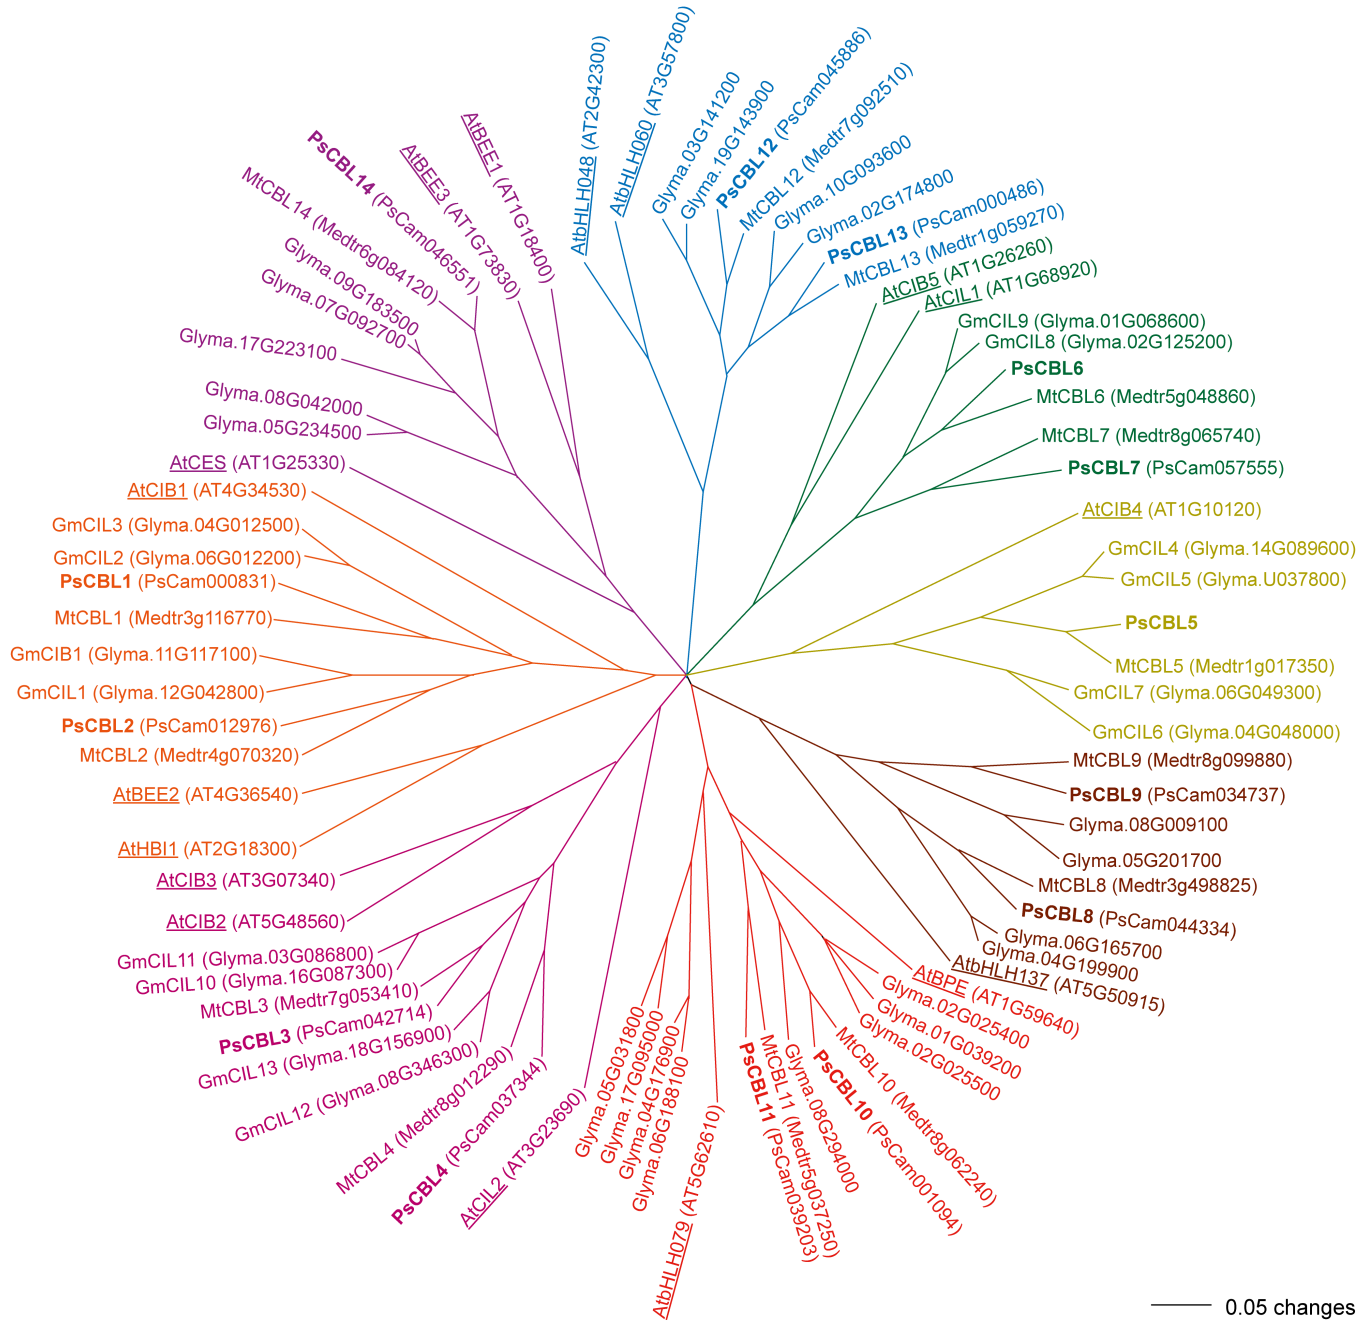

**Supplemental Figure 10:** Phylogram of legume CIB/BEE-like (CBL) proteins within the bHLH subfamily XII. Previously characterised subfamily members from *Arabidopsis* (Heim et al., 2003; Pires and Dolan, 2010) and soybean (Yang et al., 2015) are included. Pea, Medicago and additional soybean proteins were identified by BLASTp or tBLASTn searches conducted using Arabidopsis protein sequences to query the pea RNA-seq gene atlas (<http://bios.dijon.inra.fr/FATAL/cgi/pscam.cgi>), and Medicago (v4.0) and soybean (Wm82.a2.v1) protein databases at Phytozome ([phytozome.jgi.doe.gov](http://phytozome.jgi.doe.gov)). The analysis is based on the sequence alignment shown in **Supplemental File 6**. Branches with bootstrap values <55% obtained from 10,000 trees have been collapsed.

At, *Arabidopsis thaliana*; Gm, *Glycine max*; Mt, *Medicago truncatula*; Ps, *Pisum sativum*.

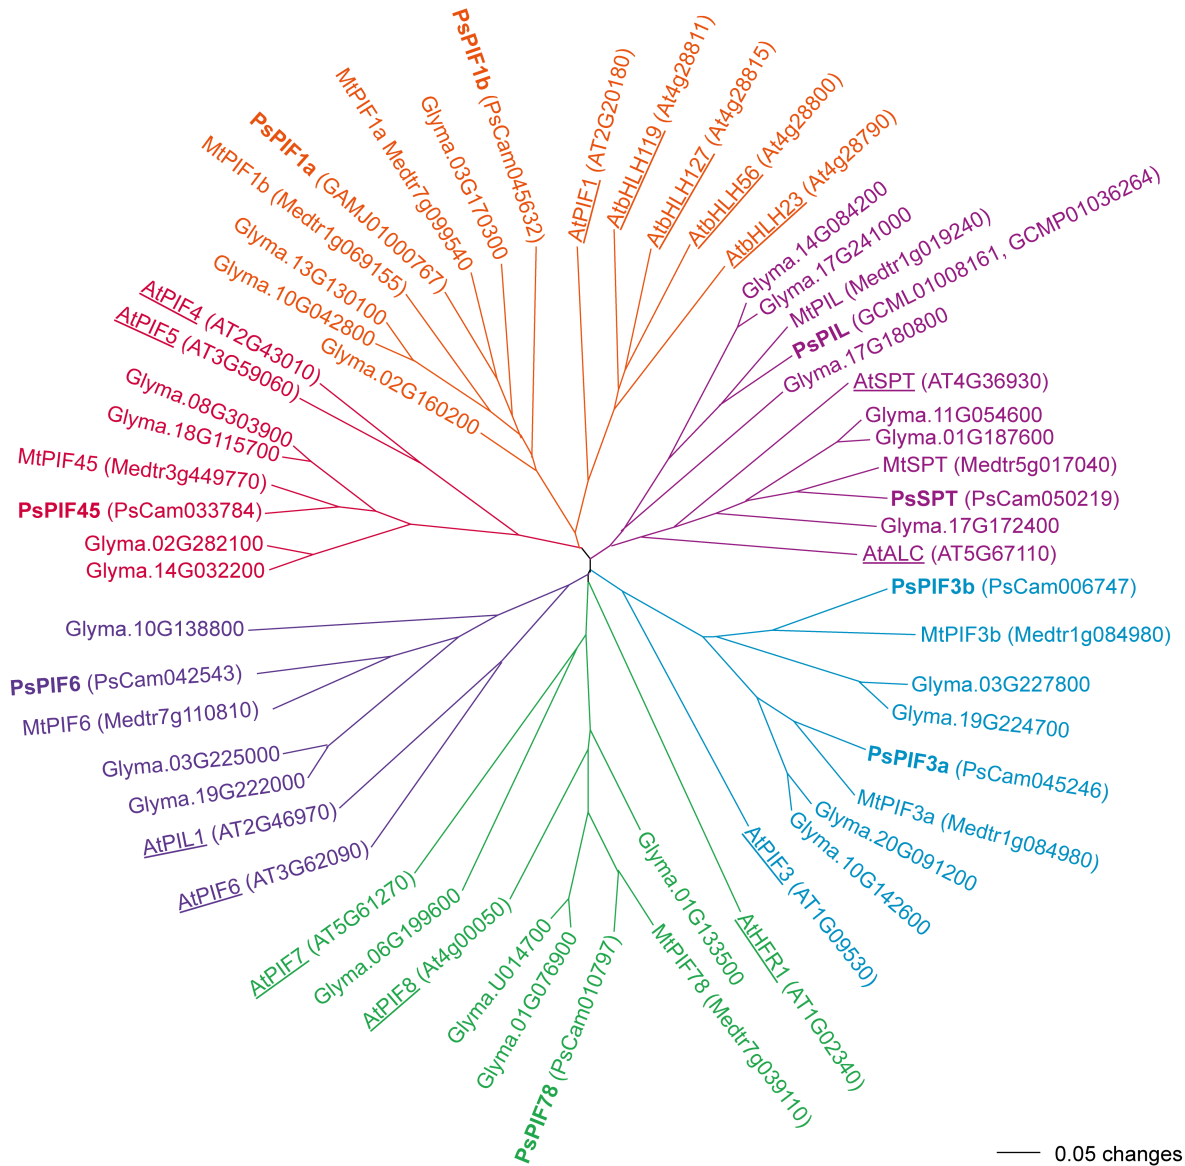

**Supplemental Figure 11:** Phylogram of legume PIF-like proteins within the bHLH subfamily VII(a+b). Previously characterised members of this subfamily from *Arabidopsis* (Heim et al., 2003; Pires and Dolan, 2010) are included. Pea, Medicago and soybean proteins were identified by BLASTp or tBLASTn searches conducted using *Arabidopsis* protein sequences to query the pea expressed sequences at the pea RNA-seq gene atlas (<http://bios.dijon.inra.fr/FATAL/cgi/pscam.cgi>) or GenBank EST or TSA databases, and Medicago (v4.0) and soybean (Wm82.a2.v1) protein databases at Phytozome ([phytozome.jgi.doe.gov](http://phytozome.jgi.doe.gov)). The analysis is based on the sequence alignment shown in **Supplemental File 7**. Branches with bootstrap values <50% obtained from 1,000 trees have been collapsed.

At, *Arabidopsis thaliana*; Gm, *Glycine max*; Mt, *Medicago truncatula*; Ps, *Pisum sativum*.





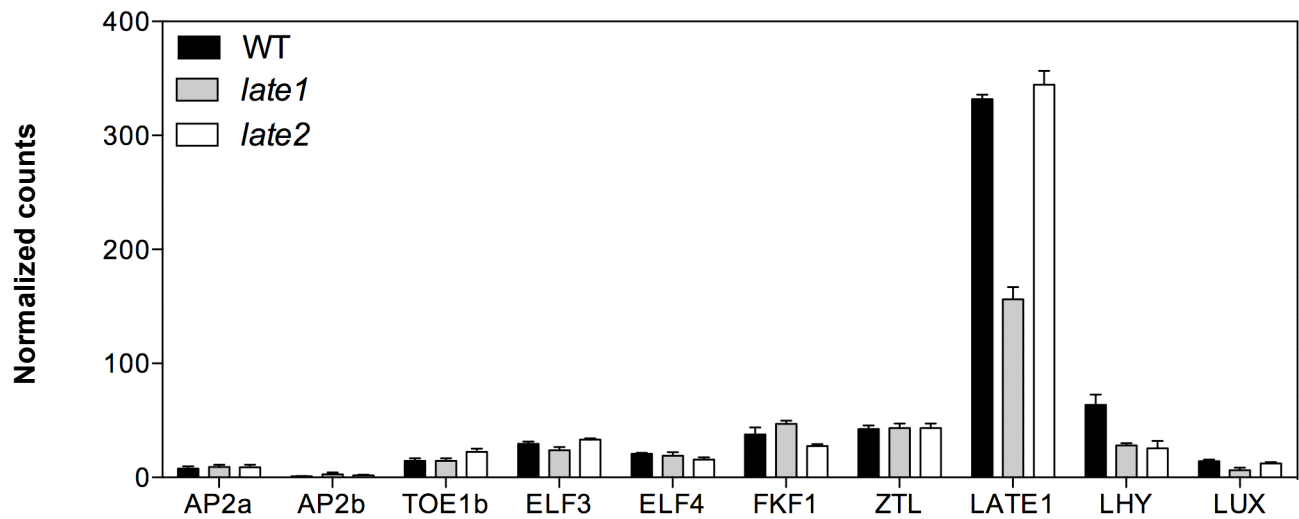

**Supplemental Figure 13:** Transcript levels in expanded leaf tissue from WT, *late1-2* and *late2-1D* mutants grown from sowing under continuous white light. Values represent mean  $\pm$  SE for  $n=3$  biological replicates, each consisting of pooled material from two plants.

**Supplemental Table 1:** Details of sequences for DOF transcription factors used in phylogenetic analyses and alignments.

Sequences were obtained from GenBank ([www.ncbi.nlm.nih.gov](http://www.ncbi.nlm.nih.gov)), Phytozome ([phytozome.jgi.doe.gov](http://phytozome.jgi.doe.gov); Goodstein et al., 2012), The Arabidopsis Information Resource (TAIR; [www.arabidopsis.org](http://www.arabidopsis.org); Lamesch et al., 2012), or the pea RNA-seq gene atlas (<http://bios.dijon.inra.fr/FATAL/cgi/pscam.cgi>; Alves-Carvalho et al., 2015), as indicated. \*Sequence alignments and comparison with Genbank accession suggests PsCam048092 sequence is partially incorrect.

| Species                     | Gene name       | Accession number | Source                                                                           | Reference(s)                             |
|-----------------------------|-----------------|------------------|----------------------------------------------------------------------------------|------------------------------------------|
| <i>Arabidopsis thaliana</i> | AtCDF1          | AT5G62430        | TAIR                                                                             | (Yanagisawa, 2002; Fornara et al., 2009) |
|                             | AtCDF2          | AT5G39660        |                                                                                  |                                          |
|                             | AtCDF3          | AT3G47500        |                                                                                  |                                          |
|                             | AtCDF4          | AT2G34140        |                                                                                  |                                          |
|                             | AtCDF5          | AT1G69570        |                                                                                  |                                          |
|                             | AtCOG1          | AT1G29160        |                                                                                  |                                          |
|                             | AtDOF1.3        | AT1G26790        |                                                                                  |                                          |
|                             | AtDOF1.6        | AT1G47655        |                                                                                  |                                          |
|                             | AtDOF5.8        | AT5G66940        |                                                                                  |                                          |
|                             | AtOBP1          | AT3G50410        |                                                                                  |                                          |
| <i>Cicer arietinum</i>      | CaCDFa1         | XP_004508727     | GenBank                                                                          | This study                               |
|                             | CaCDFa2         | XP_004514828     |                                                                                  |                                          |
|                             | CaCDFb1         | XP_004491816     |                                                                                  |                                          |
|                             | CaCDFb2         | XP_004489399     |                                                                                  |                                          |
|                             | CaCDFc1         | XP_004505416     |                                                                                  |                                          |
|                             | CaCDFc2         | XP_004490083     |                                                                                  |                                          |
| <i>Glycine max</i>          | GmDof1.2        | Glyma.01G049400  | <i>Glycine max</i> genome Wm82.a2.v1 (Schmutz et al., 2010) at Phytozome         | (Guo and Qiu, 2013)                      |
|                             | GmDof2.3        | Glyma.02G108600  |                                                                                  |                                          |
|                             | GmDof3.1        | Glyma.03G007900  |                                                                                  |                                          |
|                             | GmDof4.2        | Glyma.04G168300  |                                                                                  |                                          |
|                             | GmDof5.1        | Glyma.05G025900  |                                                                                  |                                          |
|                             | GmDof5.4        | Glyma.05G158200  |                                                                                  |                                          |
|                             | GmDof6.4        | Glyma.06G194800  |                                                                                  |                                          |
|                             | GmDof7.6        | Glyma.07G229600  |                                                                                  |                                          |
|                             | GmDof8.2        | Glyma.08G228900  |                                                                                  |                                          |
|                             | GmDof9.2        | Glyma.09G237000  |                                                                                  |                                          |
|                             | GmDof13.1       | Glyma.13G062500  |                                                                                  |                                          |
|                             | GmDof13.5       | Glyma.13G230200  |                                                                                  |                                          |
|                             | GmDof15.7       | Glyma.15G082400  |                                                                                  |                                          |
|                             | GmDof15.8       | Glyma.15G215500  |                                                                                  |                                          |
|                             | GmDof17.3       | Glyma.17G101000  |                                                                                  |                                          |
|                             | GmDof18.3       | Glyma.18G260500  |                                                                                  |                                          |
|                             | GmDof19.1       | Glyma.19G023200  |                                                                                  |                                          |
| GmDof19.2                   | Glyma.19G118000 |                  |                                                                                  |                                          |
| GmDof20.1                   | Glyma.20G035200 |                  |                                                                                  |                                          |
| <i>Medicago truncatula</i>  | MtCDFa2         | Medtr3g435480    | <i>Medicago truncatula</i> genome project v4.0 (Young et al., 2011) at Phytozome | This study                               |
|                             | MtCDFb1         | Medtr7g010950    |                                                                                  |                                          |
|                             | MtCDFb2         | Medtr6g012450    |                                                                                  |                                          |
|                             | MtCDFc1         | Medtr4g082060    |                                                                                  |                                          |
|                             | MtCDFc2-1       | Medtr5g041420    |                                                                                  |                                          |
|                             | MtCDFc2-2       | Medtr5g041400    |                                                                                  |                                          |
|                             | MtCDFc2-3       | Medtr5g041380    |                                                                                  |                                          |
|                             | MtCDFc2-4       | Medtr5g041530    |                                                                                  |                                          |
| <i>Phaseolus vulgaris</i>   | PvCDFa1         | Phvul.003G189300 | <i>Phaseolus vulgaris</i> genome v1.0                                            | This study                               |
|                             | PvCDFa2         | Phvul.009G186600 |                                                                                  |                                          |
|                             | PvCDFb1         | Phvul.008G037000 |                                                                                  |                                          |

|                             |           |                               |                                                                                                          |                            |
|-----------------------------|-----------|-------------------------------|----------------------------------------------------------------------------------------------------------|----------------------------|
|                             | PvCDFc1   | Phvul.002G170600              | (Schmutz et al., 2014) at Phytozome                                                                      |                            |
|                             | PvCDFc2   | Phvul.002G084000              |                                                                                                          |                            |
| <i>Pisum sativum</i>        | PsCDFb1   | PsCam037510                   | The pea RNA-seq gene atlas (Alves-Carvalho et al., 2015)                                                 | This study                 |
|                             | PsCDFc1   | PsCam036807                   |                                                                                                          |                            |
|                             | PsCDFc2-1 | PsCam038247                   |                                                                                                          |                            |
|                             | PsCDFc2-2 | PsCam038945                   |                                                                                                          |                            |
|                             | PsCDFc2-3 | PsCam014419                   |                                                                                                          |                            |
|                             | PsCDFc2-4 | PsCam014395                   |                                                                                                          |                            |
|                             | PsCDFb2   | GCMG01002096;<br>PsCam048092* | GenBank                                                                                                  |                            |
| <i>Solanum lycopersicum</i> | SICDF1    | Solyc03g115940                | Tomato genome ITAG2.3 (Tomato Genome Consortium, 2012) at Phytozome                                      | (Corrales et al., 2014)    |
|                             | SICDF2    | Solyc05g007880                |                                                                                                          |                            |
|                             | SICDF3    | Solyc06g069760                |                                                                                                          |                            |
|                             | SICDF4    | Solyc02g067230                |                                                                                                          |                            |
|                             | SICDF5    | Solyc02g088070                |                                                                                                          |                            |
| <i>Solanum tuberosum</i>    | StCDF1    | PGSC0003DMG400018408          | <i>Solanum tuberosum</i> genome annotation v3.4 at Phytozome (Potato Genome Sequencing Consortium, 2011) | (Kloosterman et al., 2013) |
|                             | StCDF2    | PGSC0003DMG400025129          |                                                                                                          |                            |
|                             | StCDF3    | PGSC0003DMG400001330          |                                                                                                          |                            |
|                             | StCDF4    | PGSC0003DMG400033046          |                                                                                                          |                            |
|                             | StCDF5    | PGSC0003DMG400019528          |                                                                                                          |                            |

Supplemental Table 2: Mapping marker details.

| Gene            | Marker type     | Primer names               | Primer sequence (5' to 3')                            | T <sub>m</sub> (°C) | Accession number(s) / Reference                  | Corresponding Medicago locus (Mt4.0) |
|-----------------|-----------------|----------------------------|-------------------------------------------------------|---------------------|--------------------------------------------------|--------------------------------------|
| <i>ACETISOM</i> | CAPS (MseI)     | PsAP2-F5<br>PsAP2-R8       | GTAGTGGGAAGTGATCACAATTTGG<br>GAAGAGAGTGAATCAAGAGG     | 56                  | (Aubert et al., 2006)                            | Medtr4g079780                        |
| <i>ALDO</i>     | Size            | ALDO-F<br>ALDO-R           | GAGAATTCCCCTGCTGTCC<br>CAGCATAATACTCAGTAGCACC         | 65                  | Ps-M97476/<br>Ps-M97477<br>(Aubert et al., 2006) | Medtr4g071880                        |
| <i>ATG2</i>     | HRM             | ATG2-F3<br>ATG2-R3         | TTTGGAGGGTATTAAGATTCTGC<br>TCGTAAGGACGCCTACCAC        | 53                  | J1925672                                         | Medtr4g086370                        |
| <i>BIOB</i>     | CAPS (BclI)     | BIOB-F2<br>BIOB-R2         | ATGAGCGCCTTCAAACACTT<br>AGGAACGCTCTCTGGATGTG          | 60                  | J1898613                                         | Medtr4g076870                        |
| <i>CLPSE</i>    | Size            | CLP-F<br>CLP-R             | GTATTGGAGGAGGATTTAGGG<br>GCTTATGAGTTGGAGGGGAGGGG      | 58                  | Ps-AJ276507<br>(Aubert et al., 2006)             | Medtr4g069800                        |
| <i>DEAD</i>     | Size            | DEAD-F4<br>DEAD-R4         | TGTGCAAGTCAACATTTTCCA<br>AGTTGGAGCAGGCAGCAAT          | 60                  | J1937351; J1931111;<br>J1902906                  | Medtr4g079320                        |
| <i>DUF833</i>   | HRM             | DUF-F1<br>DUF-R1           | GTGGCAAGCTCATCCAAAAT<br>CTACCGCCCAAGATTGTTTC          | 55                  | J1918734; J1925517;<br>J1920006                  | Medtr4g083440                        |
| <i>GS3B</i>     | Size            | GS3B-F<br>GS3B-R           | GGGTCTTTCTTTAAAGACCAAAGC<br>GTATACTCTTGTTCATACCATAACC | 57                  | Ps-U28925<br>(Aubert et al., 2006)               | Medtr6g071070                        |
| <i>HUA2</i>     | CAPS (SspI)     | HUA2-3F<br>HUA2-3R         | TCTTGTGATTCTATCACCC<br>TTTTCCTCTCAAGCCACAAC           | 54                  | PsCam000043                                      | Medtr4g075060                        |
| <i>ISI1</i>     | CAPS (HpaII)    | ISI1-F1<br>ISI1-R1         | GTGCTCTCCGTTCCATTCTC<br>AACTTCATGGTTCCACACC           | 60                  | JR954799                                         | Medtr4g078140                        |
| <i>LAG1</i>     | Size            | LAG1-F4<br>LAG1-R4         | CCGTGGTAAGACCAGAGTTATTG<br>AAATGGGATAGCGGGATAGC       | 60                  | J1945859; J1958010;<br>J1938125                  | Medtr4g086150                        |
| <i>MITCYSIN</i> | Size            | MITCYSIN-F2<br>MITCYSIN-R2 | CAGGTCGGTTTCGGTTTCACACTG<br>GAGCTGTGCAAAGGAGATACGTC   | 58                  | (Aubert et al., 2006)                            | Medtr4g087520                        |
| <i>N3LIKE</i>   | CAPS (HinfI)    | N3L-F<br>MtN3L-R           | GAGCCCATGCTTCTATCAACTC<br>TATATCACCATCTGAATTATGCC     | 55                  | (Aubert et al., 2006)                            | Medtr8g096320                        |
| <i>NLM</i>      | CAPS (HpyCH4IV) | NLM-F<br>NLM-R             | GCTTTTCTCTGTTCTTCACAAGCC<br>GAGAGAAGCAGTGGCATGTGCGG   | 60                  | Ps-AJ243308<br>(Aubert et al., 2006)             | Medtr8g087720                        |
| <i>PHOT1B</i>   | CAPS (NspI)     | PHOT1b-F1<br>PHOT1b-R1     | GAGGGCGGTAGGGGAATACC<br>CAATCCGTTGGGACGCAGCA          | 58                  | AY295348                                         | Medtr4g061610                        |
| <i>PIP2</i>     | CAPS (HpaII)    | PIP2-F<br>PIP2-R           | GCCGCTATCTCTGGTATGATACC<br>CAGGAACATGAGAGTCCCTAGCG    | 65                  | PS-AJ243307<br>(Aubert et al., 2006)             | Medtr4g059390                        |
| <i>PTRANS</i>   | Size            | PTRANS-F<br>PTRANS-R       | TCGTCGTGTTCCCTTGATTTATGG<br>CACCAAACAATACCACTCC       | 55                  | Ps-X68077<br>(Aubert et al., 2006)               | Medtr4g088350                        |
| <i>SVPb</i>     | HRM             | PsSVPb-5F<br>PsSVPb-6R     | GGTAAAAATGCTAAACCAAAACC<br>GGGAGTAGCAGAAAGATGTGC      | 53                  | J1898361; J1909838;<br>J1910349                  | Medtr4g093970                        |
| <i>TOE</i>      | CAPS (MlyI)     | TOE-3F<br>TOE-3R           | GAAGAGCGTCATTCTTTACGG<br>TGACCTGGCCATTACTTTGC         | 58                  | PsCam042790                                      | Medtr4g061200                        |

**Supplemental Table 3: Primer details.**  
(*Ps*, *Pisum sativum*; *At*, *Arabidopsis thaliana*.)

| Gene                   | Purpose/details           | Primer names                   | Primer sequence (5' to 3')                            | Tm |
|------------------------|---------------------------|--------------------------------|-------------------------------------------------------|----|
| <i>PsACT</i>           | qRT-PCR                   | ACT-F<br>ACT-R                 | GTGTCTGGATTGGAGGATCAATC<br>GGCCACGCTCATCATATCA        | 59 |
| <i>AtCDF1</i>          | Yeast two-hybrid analysis | AtCDF1-Y2H-1F<br>AtCDF1-Y2H-1R | ATGCTGAAAATAAAGATCCTG<br>TCACATCTGCTCATGGAAAT         | 58 |
| <i>PsCOLa</i>          | qRT-PCR                   | COP-2F<br>COP-2R               | GCTGGATTTCAGTTACAATGG<br>CTGGTACAACACCAACATCC         | 60 |
| <i>PsCOLb</i>          | qRT-PCR                   | CO1P-1F<br>CO1P-2R             | AGACGGAGTTGTGCCGGTGC<br>ACGAATTGTCTTCTCGAACC          | 60 |
| <i>PsCOLc</i>          | qRT-PCR                   | COLc-1F<br>COLc-1R             | CGCTTATGCGTTCAAAAACA<br>TTCTCCATCGGGAAACAACCTC        | 58 |
| <i>PsCOLd</i>          | qRT-PCR                   | COLd-qF1<br>COLd-qR1           | GTTTCGACATCGATTTTTGTC<br>AACTCCGACACCACGTTCC          | 58 |
| <i>PsCOLe</i>          | qRT-PCR                   | COLe-qF1<br>COLe-qR1           | CTTCAATCCCCGAATCAAGC<br>ATTTACGGGCATTTCTGTAGC         | 58 |
| <i>PsCOLf</i>          | qRT-PCR                   | COLf-F2<br>COLf-R3             | AAGTCGCCGATCTTCTTAGC<br>AAGTGCAGATGCCGTACTACC         | 58 |
| <i>PsCOLg</i>          | qRT-PCR                   | COLg-qF1<br>COLg-qR1           | GAAGAAAGTTTTGGGGATGG<br>CTTTCTGTCTCCACATGC            | 58 |
| <i>PsCOLh</i>          | qRT-PCR                   | COLh-qF1<br>COLh-qR1           | TGGTGTCTTCTCTGGAATCG<br>CACATCCTGCAATGATTTGG          | 58 |
| <i>PsCOLi</i>          | qRT-PCR                   | COLi-qF3<br>COLi-qR3           | GACTACCGCAAACCCACCTA<br>CTCTTGCTTCTCTTCTCCA           | 58 |
| <i>PsCOLj</i>          | qRT-PCR                   | COLj-2F<br>COLj-2R             | GAGGGTACGTGTGCAGAAGC<br>CTTGCTTTGCGAGAGGCATA          | 60 |
| <i>PsCOLk</i>          | qRT-PCR                   | COLk-2F<br>COLk-2R             | ATGGGATGGCCAAAATGTC<br>CCATATCCACCAAAATTCACCA         | 64 |
| <i>PsDET (TFL1a)</i>   | qRT-PCR                   | TFL1a-1F<br>TFL1a-2R           | CGTTGGTAGAGTCATAGG<br>AGGATCACTAGGGCCAGG              | 58 |
| <i>PsDNE</i>           | qRT-PCR                   | ELF4-1F<br>ELF4-1R             | GTGCTTGACAGGAACAGAGC<br>CAGAATAAAGAGAAGCAACC          | 56 |
| <i>AtFKF1</i>          | Yeast two-hybrid analysis | AtFKF1-Y2H-1F<br>AtFKF1-Y2H-1R | CTCACCCTCTGAAGCTGTGT<br>TCTTTACAGATCCGAGTCTTGC        | 62 |
| <i>PsFKF1</i>          | qRT-PCR                   | FKF-F227<br>FKF-5RACE          | GGTCGTAACGCGGTTCTTA<br>GGAACCAATACCGTCTCAAGACA        | 59 |
|                        | Yeast two-hybrid analysis | PsFKF1-Y2H-2F<br>PsFKF1-Y2H-1R | CTTACTACTCTCGAGGAGTTTGTG<br>TTACATGTCGGAGTCCCTGTCG    | 62 |
| <i>PsFTa1</i>          | qRT-PCR                   | FTLa-6F<br>FTLa-2R             | GCCCAAGCAACCTACTTTT<br>CCATCCTGGAGCGTAAACCC           | 60 |
| <i>PsFTa2</i>          | qRT-PCR                   | FTLb-3F<br>FTLb-5R             | GGAAATGACCCCGTGATCTA<br>TGAATCCCTAAGTTGGGTCG          | 60 |
| <i>PsFTb2</i>          | qRT-PCR                   | FTLe2-F7<br>FTLe2-R7           | CGACTACCGGGACAGCATT<br>CAGGTGAACCAAGGTTATAAAC         | 62 |
| <i>PsFTc</i>           | qRT-PCR                   | FTLc-8F<br>FTLc-7R             | GATATTCCAGCCACAACAAGC<br>TTATGACGCCACTCTGGAGCAA       | 62 |
| <i>PsLF (TFL1c)</i>    | qRT-PCR                   | LF-CR2<br>LF-CR3               | AAATAAGCAGCAGCAACAGGG<br>CAGACATTCAGGGACAACAG         | 60 |
| <i>PsLATE1</i>         | qRT-PCR                   | GI-GSP1<br>GI-12R              | GGTATATACAAATCCACGACAGTATGG<br>CCTTGGCTATCCAGGGTTGC   | 60 |
| <i>PsLATE2 (CDFc1)</i> | Isolation of CDS          | CDF3a-1F<br>CDF3a-1R           | TCTCTTTGATCCATCCATCACT<br>CCTGTTCAAGTTACACAGGCTCA     | 62 |
|                        | Sequencing                | CDF3a-2F<br>CDF3a-2R           | TGCTCGAGGAAGAAGCTCG<br>GACAAAATGTCGGAGGAGGA           | -  |
|                        | qRT-PCR                   | CDF3a-Q1F<br>CDF3a-Q1R         | CTTCTTCTCCGCCACAATTC<br>CGATGCTGCGAGTGATTTTA          | 60 |
|                        | HRM functional marker     | CDF3a-HRM-1F<br>CDF3a-HRM-1R   | AAGCGTCAACCGCTGATGTA<br>TGTGATTCGCAATTAGGTTCC         | 53 |
|                        | Yeast two-hybrid analysis | CDF3a-Y2H-1F<br>CDF3a-HRM-1R   | ATGTCAGAGGTTAAAGACCCTGC<br>TGTGATTCGCAATTAGGTTCC      | 62 |
| <i>PsLHY</i>           | qRT-PCR                   | MYB1-Q1<br>MYB1-Q2             | GACGGATGCGCTAGAGAAGAATGG<br>AGAATAGAGCCCCGAAACGCAAGTC | 60 |
| <i>PsPIM</i>           | qRT-PCR                   | PIM-4F<br>PIM-6R               | GCTTCAGAGTTTGGAAACAGC<br>GACTCCATGGTGGTTTGG           | 58 |
| <i>PsPRR37a</i>        | qRT-PCR                   | PRR37-5F<br>PRR37-5R           | TGGCAACATGTTTGGAGAAG<br>ACACTCAAGCCTCTGCTTCC          | 60 |
| <i>PsPRR59a</i>        | qRT-PCR                   | PRR59-2F<br>PRR59-4R           | GGTATCTGGCTATGCACTTCTCTCG<br>CAAACATGCTGCCACAGATT     | 60 |

## Supplemental Data. Ridge et al. Plant Cell (2016) 10.1105/tpc.15.01011

|                |         |                          |                                                 |    |
|----------------|---------|--------------------------|-------------------------------------------------|----|
| <i>PsSN</i>    | qRT-PCR | LUX-Q1F<br>LUX-Q1R       | TTCTCACCCCTCACATGTCTCC<br>TGGACGAAGTCACAATCAACA | 56 |
| <i>PsTOC1a</i> | qRT-PCR | TOC1-92-1F<br>TOC1-92-1R | GCCTGGAATTTCAATCCAAC<br>GGATGCTGTCTGATGAACC     | 58 |
| <i>PsUNI</i>   | qRT-PCR | UNI-1F<br>UNI-2R         | CATCAGAGCTGAAAGAAGG<br>GCTTCCTTTTCACGTTGC       | 55 |
| <i>PsVEG1</i>  | qRT-PCR | FULc-2F<br>FULc-2R       | CGATGCCTTGAAACCATAGG<br>AATCCAATGACCCTCTGC      | 58 |
| <i>PsVEG2</i>  | qRT-PCR | FD-6F<br>FD-3R           | ATTTGATCCAAACGTCGGTGT<br>ATCAACTTTTTGCTCCAGTTCG | 60 |

**Supplemental Table 4:** RNAseq Mapping results.

RNAseq reads were mapped to pea transcriptome reference (PsUniLowCopyClusters, including organelles; Alves-Carvalho et al., 2015) using STAR (Spliced Transcript Alignment to a Reference; Dobin et al., 2013).

|                                  | <b>NGB5839 (WT)</b> |              |              | <i>late1-2</i> |              |              | <i>late2-1D</i> |              |              |
|----------------------------------|---------------------|--------------|--------------|----------------|--------------|--------------|-----------------|--------------|--------------|
|                                  | <b>rep1</b>         | <b>rep2</b>  | <b>rep3</b>  | <b>rep1</b>    | <b>rep2</b>  | <b>rep3</b>  | <b>rep1</b>     | <b>rep2</b>  | <b>rep3</b>  |
| # input reads                    | 6951737             | 2306874      | 3880898      | 6270944        | 2144604      | 3457203      | 6120831         | 1583277      | 3689226      |
| average input read length        | 150                 | 149          | 150          | 150            | 149          | 150          | 150             | 149          | 150          |
| uniquely mapped reads            | 4475805             | 1484633      | 2496971      | 4005219        | 1416949      | 2139211      | 3948023         | 986113       | 2228214      |
| <b>uniquely mapped reads (%)</b> | <b>64.38</b>        | <b>64.36</b> | <b>64.34</b> | <b>63.87</b>   | <b>66.07</b> | <b>61.88</b> | <b>64.5</b>     | <b>62.28</b> | <b>60.4</b>  |
| Average mapped length            | 149.69              | 148.7        | 149.27       | 149.71         | 148.51       | 149.12       | 149.66          | 148.68       | 148.9        |
| non canonical                    | 6678                | 2731         | 4449         | 5482           | 2376         | 3123         | 5846            | 1874         | 4070         |
| Mismatch rate per base (%)       | 0.52                | 0.27         | 0.27         | 0.54           | 0.26         | 0.3          | 0.52            | 0.28         | 0.31         |
| Deletion rate per base (%)       | 0.01                | 0.01         | 0.01         | 0.02           | 0.01         | 0.01         | 0.01            | 0.02         | 0.01         |
| Deletion average length          | 2.05                | 2.17         | 2.21         | 1.99           | 2.1          | 2.03         | 2.08            | 2.22         | 2.18         |
| Insertion rate per base (%)      | 0.01                | 0.01         | 0.01         | 0.01           | 0.01         | 0.01         | 0.01            | 0.01         | 0.01         |
| Insertion average length         | 1.75                | 1.77         | 1.68         | 1.54           | 1.61         | 1.56         | 1.62            | 1.63         | 1.68         |
| Multi mapping reads              | 486855              | 187955       | 292785       | 415921         | 163087       | 264363       | 448588          | 127774       | 291553       |
| Multi mapping reads (%)          | 7.01                | 8.17         | 7.54         | 6.63           | 7.62         | 7.65         | 7.33            | 8.09         | 7.92         |
| <b>Unmapped reads (%)</b>        | <b>28.61</b>        | <b>27.47</b> | <b>28.12</b> | <b>29.5</b>    | <b>26.31</b> | <b>30.47</b> | <b>28.17</b>    | <b>29.63</b> | <b>31.68</b> |

## SUPPLEMENTAL REFERENCES

- Alves-Carvalho, S., Aubert, G., Carrère, S., Cruaud, C., Brochot, A.-L., Jacquin, F., Klein, A., Martin, C., Boucherot, K., Kreplak, J., da Silva, C., Moreau, S., Gamas, P., Wincker, P., Gouzy, J., and Burstin, J. (2015). Full-length *de novo* assembly of RNA-seq data in pea (*Pisum sativum* L.) provides a gene expression atlas and gives insights into root nodulation in this species. *Plant J.* **84**: 1-19.
- Aubert, G., Morin, J., Jacquin, F., Loridon, K., Quillet, M.C., Petit, A., Rameau, C., Lejeune-Henaut, I., Huguet, T., and Burstin, J. (2006). Functional mapping in pea, as an aid to the candidate gene selection and for investigating synteny with the model legume *Medicago truncatula*. *Theor. Appl. Genet.* **112**: 1024-1041.
- Aukerman, M.J., and Sakai, H. (2003). Regulation of flowering time and floral organ identity by a MicroRNA and its *APETALA2*-like target genes. *Plant Cell* **15**: 2730-2741.
- Corrales, A.R., Nebauer, S.G., Carrillo, L., Fernandez-Nohales, P., Marqués, J., Renau-Morata, B., Granell, A., Pollmann, S., Vicente-Carbajosa, J., Molina, R.V., and Medina, J. (2014). Characterization of tomato Cycling Dof Factors reveals conserved and new functions in the control of flowering time and abiotic stress responses. *J. Exp. Bot.* **65**: 995-1012.
- Dobin, A., Davis, C.A., Schlesinger, F., Drenkow, J., Zaleski, C., Jha, S., Batut, P., Chaisson, M., and Gingeras, T.R. (2013). STAR: ultrafast universal RNA-seq aligner. *Bioinformatics* **29**: 15-21.
- Fan, C., Hu, R., Zhang, X., Wang, X., Zhang, W., Zhang, Q., Ma, J., and Fu, Y.-F. (2014). Conserved CO-FT regulons contribute to the photoperiod flowering control in soybean. *BMC Plant Biology* **14**: 9.
- Fornara, F., Panigrahi, K.C., Gissot, L., Sauerbrunn, N., Rühl, M., Jarillo, J.A., and Coupland, G. (2009). Arabidopsis *DOF* transcription factors act redundantly to reduce *CONSTANS* expression and are essential for a photoperiodic flowering response. *Dev. Cell* **17**: 75-86.
- Goodstein, D.M., Shu, S., Howson, R., Neupane, R., Hayes, R.D., Fazo, J., Mitros, T., Dirks, W., Hellsten, U., Putnam, N., and Rokhsar, D.S. (2012). Phytozome: a comparative platform for green plant genomics. *Nucleic Acids Res.* **40**: D1178-1186.
- Guo, Y., and Qiu, L.J. (2013). Genome-wide analysis of the Dof transcription factor gene family reveals soybean-specific duplicable and functional characteristics. *PLoS One* **8**: e76809.
- Heim, M.A., Jakoby, M., Werber, M., Martin, C., Weisshaar, B., and Bailey, P.C. (2003). The Basic Helix-Loop-Helix Transcription Factor Family in Plants: A Genome-Wide Study of Protein Structure and Functional Diversity. *Molecular Biology and Evolution* **20**: 735-747.
- Iwata, Y., Yamada, T., and Koizumi, N. (2008). Transcriptional regulation of an Arabidopsis gene encoding a CCT domain-containing protein during endoplasmic reticulum stress. *Plant Biotechnology* **25**: 397-402.
- Khanna, R., Kronmiller, B., Maszle, D.R., Coupland, G., Holm, M., Mizuno, T., and Wu, S.-H. (2009). The Arabidopsis B-Box Zinc Finger Family. *The Plant Cell* **21**: 3416-3420.
- Kloosterman, B., Abelenda, J.A., Carretero, M.D.M.G., Oortwijn, M., de Boer, J.M., Kowitzanich, K., Horvath, B.M., van Eck, H.J., Smaczniak, C., Prat, S., Visser, R.G., and Bachem, C.W.B. (2013). Naturally occurring allele diversity allows potato cultivation in northern latitudes. *Nature* **495**: 246-250.
- Lamesch, P., Berardini, T.Z., Li, D., Swarbreck, D., Wilks, C., Sasidharan, R., Muller, R., Dreher, K., Alexander, D.L., Garcia-Hernandez, M., Karthikeyan, A.S., Lee, C.H., Nelson, W.D., Ploetz, L., Singh, S., Wensel, A., and Huala, E. (2012). The Arabidopsis Information Resource (TAIR): improved gene annotation and new tools. *Nucleic Acids Res* **40**: D1202-1210.
- Nelson, D.C., Lasswell, J., Rogg, L.E., Cohen, M.A., and Bartel, B. (2000). *FKF1*, a clock-controlled gene that regulates the transition to flowering in *Arabidopsis*. *Cell* **101**: 331-340.
- Pires, N., and Dolan, L. (2010). Origin and Diversification of Basic-Helix-Loop-Helix Proteins in Plants. *Molecular Biology and Evolution* **27**: 862-874.
- Robson, F., Costa, M.M.R., Hepworth, S.R., Vizir, I., Pinheiro, M., Reeves, P.H., Putterill, J., and Coupland, G. (2001). Functional importance of conserved domains in the flowering-time gene *CONSTANS* demonstrated by analysis of mutant alleles and transgenic plants. *The Plant Journal* **28**: 619-631.
- Schmutz, J., McClean, P.E., Mamidi, S., Wu, G.A., Cannon, S.B., Grimwood, J., Jenkins, J., Shu, S., Song, Q., Chavarro, C., Torres-Torres, M., Geffroy, V., Moghaddam, S.M., Gao, D., Abernathy, B., Barry, K., Blair, M., Brick, M.A., Chovatia, M., Gepts, P., Goodstein, D.M., Gonzales, M., Hellsten, U., Hyten, D.L., Jia, G., Kelly, J.D., Kudrna, D., Lee, R., Richard, M.M., Miklas, P.N., Osorno, J.M., Rodrigues, J., Thareau, V., Urrea, C.A., Wang, M., Yu, Y., Zhang, M., Wing, R.A., Cregan, P.B.,



- Rokhsar, D.S., and Jackson, S.A.** (2014). A reference genome for common bean and genome-wide analysis of dual domestications. *Nat Genet* **46**: 707-713.
- Schmutz, J., Cannon, S.B., Schlueter, J., Ma, J., Mitros, T., Nelson, W., Hyten, D.L., Song, Q., Thelen, J.J., Cheng, J., Xu, D., Hellsten, U., May, G.D., Yu, Y., Sakurai, T., Umezawa, T., Bhattacharyya, M.K., Sandhu, D., Valliyodan, B., Lindquist, E., Peto, M., Grant, D., Shu, S., Goodstein, D., Barry, K., Futrell-Griggs, M., Abernathy, B., Du, J., Tian, Z., Zhu, L., Gill, N., Joshi, T., Libault, M., Sethuraman, A., Zhang, X.C., Shinozaki, K., Nguyen, H.T., Wing, R.A., Cregan, P., Specht, J., Grimwood, J., Rokhsar, D., Stacey, G., Shoemaker, R.C., and Jackson, S.A.** (2010). Genome sequence of the palaeopolyploid soybean. *Nature* **463**: 178-183.
- Schultz, T.F., Kiyosue, T., Yanovsky, M.J., Wada, M., and Kay, S.A.** (2001). A role for LKP2 in the circadian clock of *Arabidopsis*. *Plant Cell* **13**: 2659-2670.
- Somers, D.E., Schultz, T.F., Milnamow, M., and Kay, S.A.** (2000). *ZEITLUPE* encodes a novel clock-associated PAS protein from *Arabidopsis*. *Cell* **101**: 319-329.
- Wang, Y., Wang, L., Zou, Y., Chen, L., Cai, Z., Zhang, S., Zhao, F., Tian, Y., Jiang, Q., Ferguson, B.J., Gresshoff, P.M., and Li, X.** (2014). Soybean miR172c targets the repressive AP2 transcription factor NNC1 to activate *ENOD40* expression and regulate nodule initiation. *Plant Cell* **26**: 4782-4801.
- Weller, J.L., Liew, L.C., Hecht, V.F.G., Rajandran, V., Laurie, R.E., Ridge, S., Wenden, B., Vander Schoor, J.K., Jaminon, O., Blassiau, C., Dalmais, M., Rameau, C., Bendahmane, A., Macknight, R.C., and Lejeune-Hénaut, I.** (2012). A conserved molecular basis for photoperiod adaptation in two temperate legumes. *Proceedings of the National Academy of Sciences* **109**: 21158-21163.
- Wong, A.C., Hecht, V.F., Picard, K., Diwadkar, P., Laurie, R.E., Wen, J., Mysore, K., Macknight, R.C., and Weller, J.L.** (2014). Isolation and functional analysis of *CONSTANS-LIKE* genes suggests that a central role for *CONSTANS* in flowering time control is not evolutionarily conserved in *Medicago truncatula*. *Frontiers in Plant Science* **5**: 486.
- Wu, F., Price, B.W., Haider, W., Seufferheld, G., Nelson, R., and Hanzawa, Y.** (2014). Functional and evolutionary characterization of the *CONSTANS* gene family in short-day photoperiodic flowering in soybean. *PLoS One* **9**: e85754.
- Yanagisawa, S.** (2002). The Dof family of plant transcription factors. *Trends Plant Sci.* **7**: 555-560.
- Yang, D., Zhao, W., Meng, Y., Li, H., and Liu, B.** (2015). A CIB1-LIKE transcription factor GmCIL10 from soybean positively regulates plant flowering. *Sci. China Life Sci.* **58**: 261-269.
- Young, N.D., Debelle, F., Oldroyd, G.E., Geurts, R., Cannon, S.B., Udvardi, M.K., Benedito, V.A., Mayer, K.F., Gouzy, J., Schoof, H., Van de Peer, Y., Proost, S., Cook, D.R., Meyers, B.C., Spannagl, M., Cheung, F., De Mita, S., Krishnakumar, V., Gundlach, H., Zhou, S., Mudge, J., Bharti, A.K., Murray, J.D., Naoumkina, M.A., Rosen, B., Silverstein, K.A., Tang, H., Rombauts, S., Zhao, P.X., Zhou, P., Barbe, V., Bardou, P., Bechner, M., Bellec, A., Berger, A., Berges, H., Bidwell, S., Bisseling, T., Choisine, N., Couloux, A., Denny, R., Deshpande, S., Dai, X., Doyle, J.J., Dudez, A.M., Farmer, A.D., Fouteau, S., Franken, C., Gibelin, C., Gish, J., Goldstein, S., Gonzalez, A.J., Green, P.J., Hallab, A., Hartog, M., Hua, A., Humphray, S.J., Jeong, D.H., Jing, Y., Jocker, A., Kenton, S.M., Kim, D.J., Klee, K., Lai, H., Lang, C., Lin, S., Macmil, S.L., Magdelenat, G., Matthews, L., McCorrison, J., Monaghan, E.L., Mun, J.H., Najar, F.Z., Nicholson, C., Noirot, C., O'Bleness, M., Paule, C.R., Poulain, J., Prion, F., Qin, B., Qu, C., Retzel, E.F., Riddle, C., Sallet, E., Samain, S., Samson, N., Sanders, I., Saurat, O., Scarpelli, C., Schiex, T., Segurens, B., Severin, A.J., Sherrier, D.J., Shi, R., Sims, S., Singer, S.R., Sinharoy, S., Sterck, L., Viollet, A., Wang, B.B., Wang, K., Wang, M., Wang, X., Warfsmann, J., Weissenbach, J., White, D.D., White, J.D., Wiley, G.B., Wincker, P., Xing, Y., Yang, L., Yao, Z., Ying, F., Zhai, J., Zhou, L., Zuber, A., Denarie, J., Dixon, R.A., May, G.D., Schwartz, D.C., Rogers, J., Quetier, F., Town, C.D., and Roe, B.A.** (2011). The *Medicago* genome provides insight into the evolution of rhizobial symbioses. *Nature* **480**: 520-524.
